# Supplementary material for: Nanohybrids with switchable multicolour emission for anticounterfeiting
Source: Royal Society of Chemistry journal article supplement (doi:10.1039/d3tc01008b), 2023-01-01
Supplement: d3tc01008b1.pdf [file d3tc01008b1.pdf]

## Supporting Information for

Nanohybrids with switchable multicolor emission for anticounterfeiting

*Yongmin Duan, Siyuan Fu, Zehui Wang, Shiqing Xu, Junjie Zhang\**

*Key Laboratory of Rare Earth Optoelectronic Materials and Devices of Zhejiang Province, Institute of Optoelectronic Materials and Devices, China Jiliang University, Hangzhou 310018, P. R. China*

E-mail addresses: [jjzhang@cjl.u.edu.cn](mailto:jjzhang@cjl.u.edu.cn)

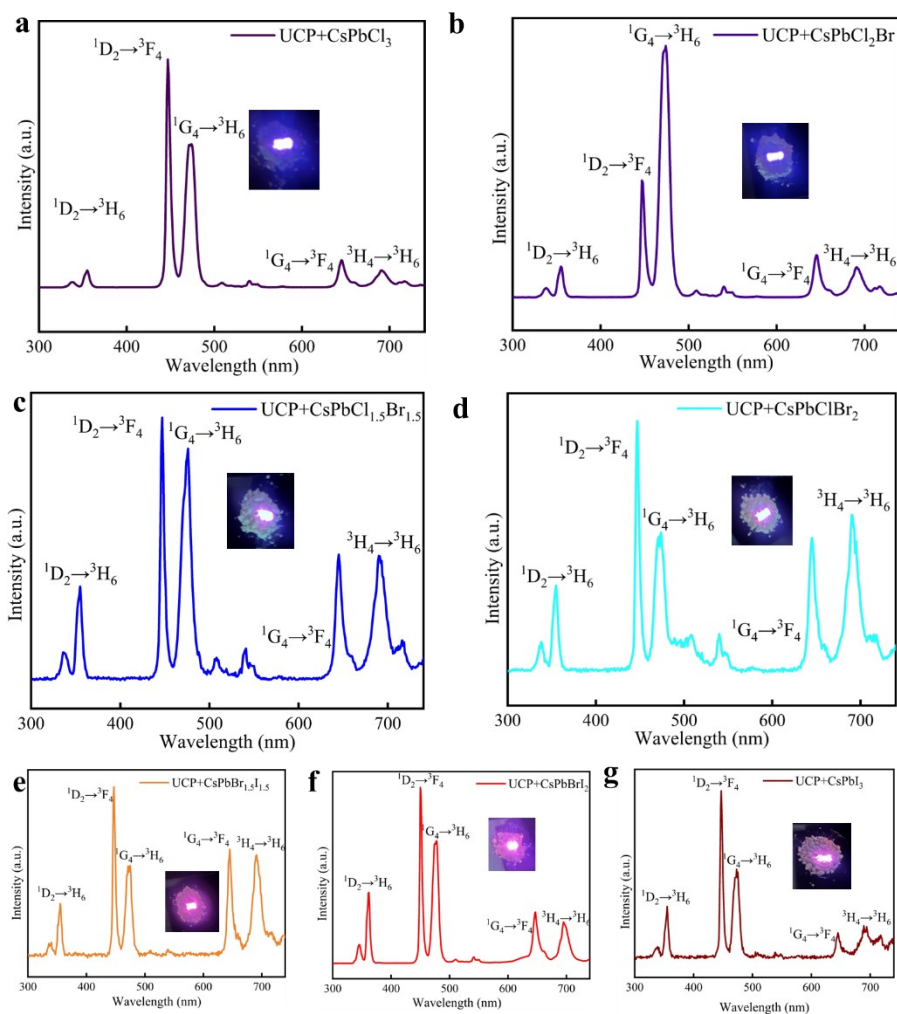

**Figure S1.** (a-g) UCL spectra of different samples. Inset of (b-k): Digital photographs of different samples under 980 nm laser diode.

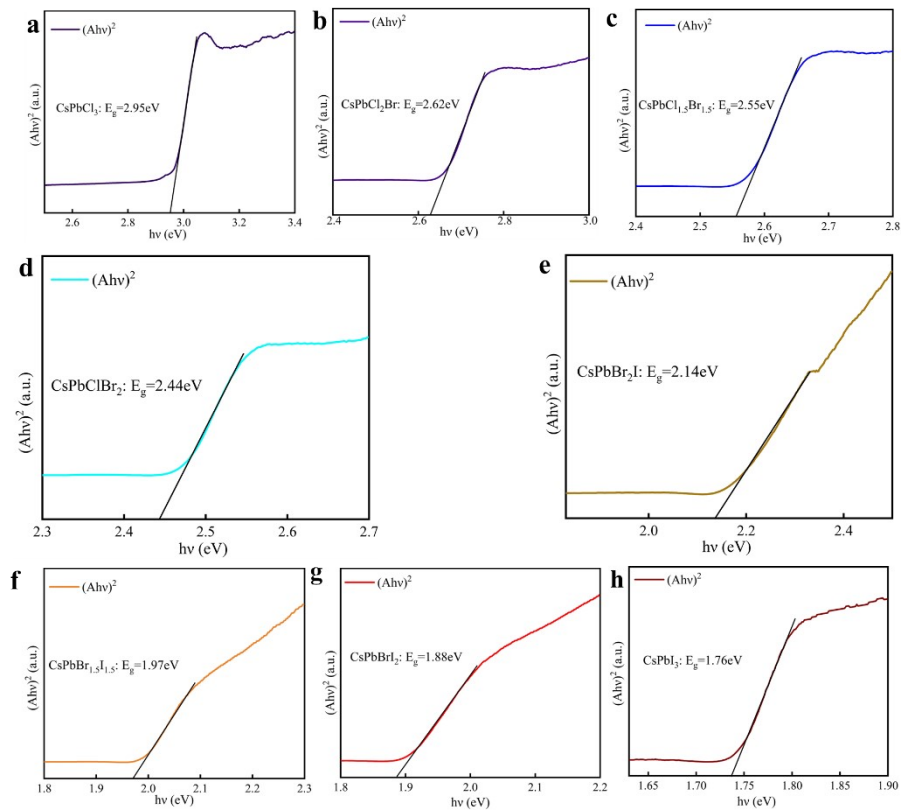

**Figure S2.** (a-h)  $(A)hv^2$ - $hv$  plot of different CsPbX<sub>3</sub> QDs glasses: the oblique line is the fitted curve to estimate the  $E_g$ .

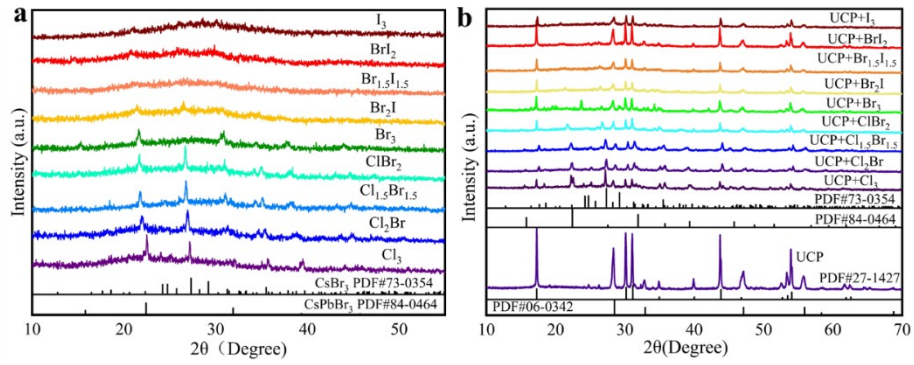

**Figure S3.** (a, b) XRD patterns of different CsPbX<sub>3</sub> QDs glasses and nanohybrids, respectively.

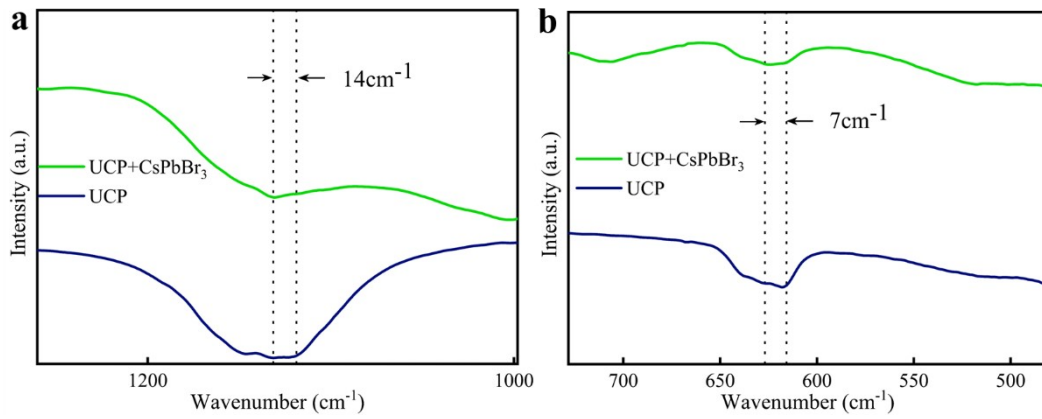

**Figure S4.** The partial magnification spectroscopy of the FTIR peaks shift.

**Table S1** The fitting parameters of UCL decays lifetime for Tm/Yb: NaYF<sub>4</sub> UCP+CsPbBr<sub>3</sub> QDs glasses nano hybrids at different emission bands excited by 980 nm.

| UCP/QDs    | 362 nm |                     | 450 nm |                     | 478 nm |                     | 524 nm |                     |
|------------|--------|---------------------|--------|---------------------|--------|---------------------|--------|---------------------|
|            | A      | $\tau(\mu\text{s})$ | A      | $\tau(\mu\text{s})$ | A      | $\tau(\mu\text{s})$ | A      | $\tau(\mu\text{s})$ |
| UCP        | 1.07   | 430.28              | 1.07   | 426.55              | 1.17   | 983.20              | --     | --                  |
| <b>8:1</b> | 1.07   | 427.35              | 1.07   | 424.40              | 1.16   | 920.21              | 1.05   | 490.19              |
| <b>2:1</b> | 1.07   | 424.19              | 1.06   | 420.69              | 1.15   | 895.57              | 1.05   | 504.63              |
| <b>1:2</b> | 1.07   | 420.74              | 1.07   | 419.84              | 1.16   | 883.90              | 1.05   | 533.77              |
| <b>1:8</b> | 1.07   | 417.01              | 1.05   | 414.34              | 1.14   | 851.28              | 1.05   | 551.04              |

Both Tm<sup>3+</sup> ions and CsPbBr<sub>3</sub> QDs UCL lifetimes in **nano hybrids V** are obtained by single exponential decay <sup>1</sup>:

$$I = A \exp(-t / \tau) \quad (\text{S1})$$

Where I is the luminescence intensity of Tm<sup>3+</sup> ions or CsPbBr<sub>3</sub> QDs; t is the time; A is fitting constants;  $\tau$  is fluorescence lifetimes for the exponential components.

The DCL lifetime of CsPbBr<sub>3</sub> QDs glasses are obtained by double exponential decay <sup>1</sup>:

$$I = A_1 \exp(-t / \tau_1) + A_2 \exp(-t / \tau_2) \quad (\text{S2})$$

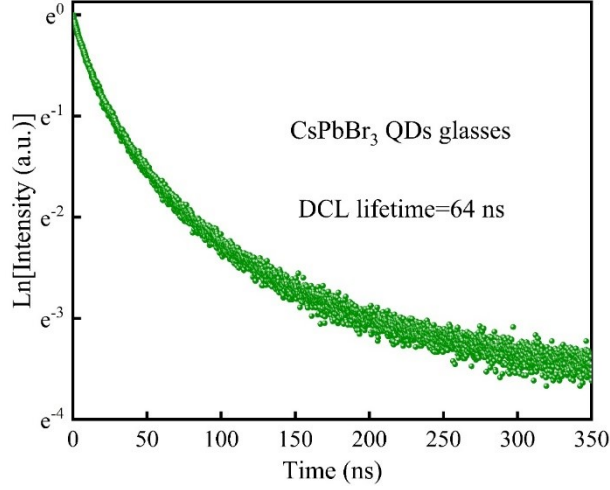

**Figure S5.** DCL decay curve of CsPbBr<sub>3</sub> QDs glasses.

**Note 1: Förster radius (R<sub>0</sub>)**

Förster radius R<sub>0</sub> is the distance between donor and acceptor when the energy transfer efficiency is 50%, the equation is defined as <sup>2</sup>:

$$R_0^6 = \left[ \frac{9(\ln 10)\kappa^2\eta_D J}{128\pi^5 N_A n^4} \right] \quad (\text{S3})$$

Known from the **Equation S3** that Förster radius R<sub>0</sub> is proportional to the orientation factor of the interacting dipoles (κ<sup>2</sup>), the donor's UCL fluorescence quantum yield in the absence of acceptor (η<sub>D</sub>), spectral overlap integral (M<sup>-1</sup> cm<sup>-1</sup> nm<sup>4</sup>) (J), and is inversely proportional to the Avogadro constant (N<sub>A</sub>), and the average refractive index of the medium (n). The spectral overlap integral J is calculated as <sup>2</sup>:

$$J(\lambda) = \int F_D(\lambda)\epsilon_A\lambda^4 d\lambda \quad (\text{S4})$$

Where F<sub>D</sub> (λ) is the UCL spectrum of the donor normalized to unit area, which is 5.4\*10<sup>16</sup>, ε<sub>A</sub> is the molar extinction coefficient (M<sup>-1</sup> cm<sup>-1</sup>) of quantum dots, which is 5\*10<sup>6</sup> M<sup>-1</sup>cm<sup>-1</sup>, λ is the wavelength range of spectral overlap of donor and acceptor (300~600 nm). Herein, assuming that interacting dipoles κ<sup>2</sup> is a random orientation of donor and acceptor, thus the value of κ<sup>2</sup> is 2/3 (the most used value in the literature), the value of η<sub>D</sub> is 0.01%, the average refractive index of the medium (glass and UCP) is assumed as 1.5.

**Note 2 Determination of the slope of the double logarithmic plots of the UCL intensity vs. excitation power density.**

The relationship between UCL intensity and the laser power densities of 980 nm is defined as <sup>3</sup>,

$$I_{\text{UCL}} \propto (I_{\text{NIR}})^n \quad (\text{S5})$$

Where n refers to the number of photons.

## References

1. C. X. Li, B. W. Chen, D. G. Deng, M. Wu, L. H. Yu, H. Li, C. Y. Shen, L. Wang, S. Q. Xu, J. Alloys Compd, 2020, **838**, 155675.
2. R. Marin, L. Labrador-Páez, A. Skripka, P.H. González, A. Benayas, P. Canton, D. Jaque, F. Vetrone, ACS Photonics. 2018, **5**, 2261-2270.
3. Z. Chen, Q. Zhou, H.T. Du, Y. Yu, C. Zhang, S.H. Han, Z.Y. Pang, Photonics. Res, 2021, **9**, 865-872.
